# Supplementary material for: A green process for the synthesis of porous TiO 2 from ilmenite ore using molten salt alkali decomposition for photocatalytic applications
Source: Royal Society of Chemistry journal article supplement (doi:10.1039/d3su00009e), 2023-01-01
Supplement: d3su00009e1.pdf [file d3su00009e1.pdf]

‡Electronic Supplementary Material (ESI) for RSC Sustainability.  
This journal is © The Royal Society of Chemistry.

## Supplementary Data

**A Green Process for the Synthesis of Porous TiO<sub>2</sub> from Ilmenite Ore using Molten Salt**

**Alkali Decomposition for Photo-Catalytic Applications**

Shaik Saida,<sup>\*a</sup> Dipak Kumar Gorai<sup>a</sup> and Tarun Kumar Kundu<sup>a</sup>

*Metallurgical and Materials Engineering Department, Indian Institute of Technology Kharagpur,  
Kharagpur, West Bengal, India, 721302.*

\*Corresponding author: Shaik Saida, Email: shahid.saida@iitkgp.ac.in.

Supplementary Fig. S1

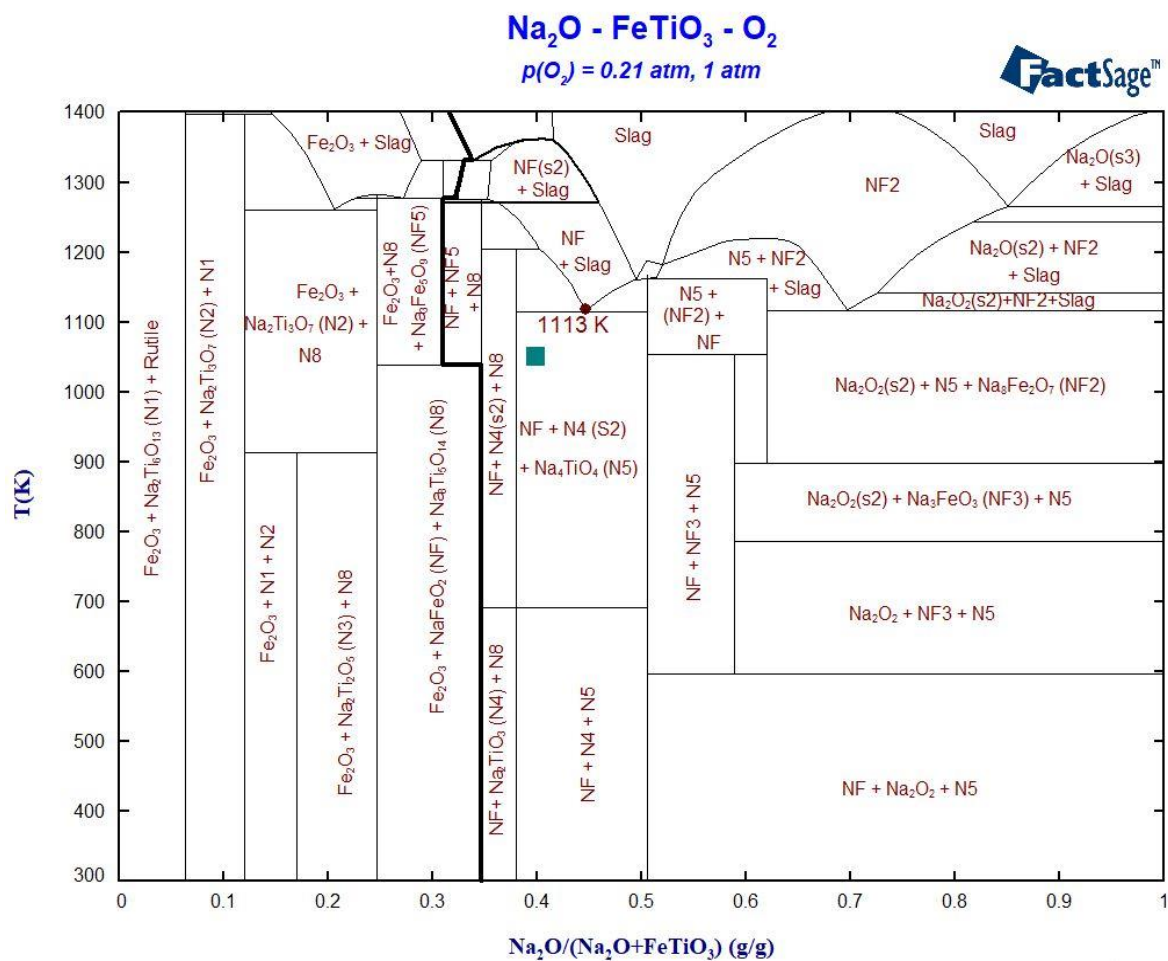

Fig. S1. Pseudo binary phase diagram of Na<sub>2</sub>O-FeTiO<sub>3</sub> in presence of atmospheric oxygen.

Supplementary Table. S1

Table. S1. Elemental composition of the alkali decomposed ilmenite, water-leached residue, and calcined titania.

| <b>Elements</b>               | <b>Alkali Decomposition</b>             |                      | <b>Water Leach Residue</b>                                    |                      | <b>Calcined TiO<sub>2</sub></b> |                      |
|-------------------------------|-----------------------------------------|----------------------|---------------------------------------------------------------|----------------------|---------------------------------|----------------------|
| <b>Conditions</b>             | <b>Temperature-1073 K,<br/>Time-1hr</b> |                      | <b>S/L ratio -5, Time -<br/>45min, Temperature-<br/>343K.</b> |                      | <b>HCl-10% Excess</b>           |                      |
|                               | <b>Wt.%</b>                             | <b>R<sup>2</sup></b> | <b>Wt.%</b>                                                   | <b>R<sup>2</sup></b> | <b>Wt.%</b>                     | <b>R<sup>2</sup></b> |
| <b>O</b>                      | 31.1                                    | 0.5                  | 40.5                                                          | 0.8                  | 39.1                            | 1.1                  |
| <b>Na</b>                     | 30.1                                    | 0.6                  | 4.1                                                           | 0.4                  | 0                               | 0                    |
| <b>Fe</b>                     | 20.2                                    | 0.4                  | 26.96                                                         | 0.6                  | 5.1                             | 1                    |
| <b>Ti</b>                     | 17.4                                    | 0.5                  | 24.87                                                         | 0.5                  | 55.8                            | 0.8                  |
| <b>Si</b>                     | 0.3                                     | 0.1                  | 0                                                             | 0                    | 0                               | 0                    |
| <b>Al</b>                     | 0.3                                     | 0.1                  | 0                                                             | 0                    | 0                               | 0                    |
| <b>Mn</b>                     | 0.2                                     | 0.1                  | 0.22                                                          | 0.1                  | 0                               | 0                    |
| <b>Mg</b>                     | 0.2                                     | 0.1                  | 0.21                                                          | 0.1                  | 0                               | 0                    |
| <b>V</b>                      | 0.2                                     | 0.1                  | 0                                                             | 0                    | 0                               | 0                    |
| <b>Product<br/>Weight (g)</b> | ~16.5                                   |                      | ~11.5                                                         |                      | ~4.83                           |                      |

Supplementary Fig. S2

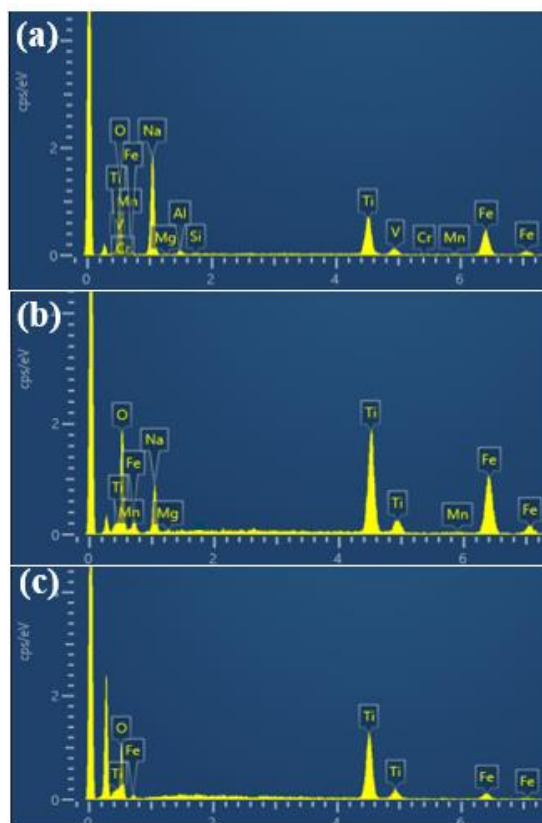

Fig. S 2. EDS spectrum of the solid residues (a) alkali decomposed ilmenite, (b) water-leached residue, and (c) calcined  $\text{TiO}_2$ .
